# Supplementary material for: Triel bonds within anion···anion complexes
Source: Royal Society of Chemistry journal article supplement (doi:10.1039/d1cp04296c), 2021-01-01
Supplement: d1cp04296c1.pdf [file d1cp04296c1.pdf]

## Triel Bonds within Anion...Anion Complexes

Mariusz Michalczyk, <sup>\*1</sup> Wiktor Zierkiewicz, <sup>\*1</sup> Rafał Wysokiński,<sup>1</sup>  
and Steve Scheiner <sup>\*2</sup>

<sup>1</sup> Faculty of Chemistry, Wrocław University of Science and Technology, Wybrzeże  
Wyspiańskiego 27, 50-370 Wrocław, Poland

<sup>2</sup> Department of Chemistry and Biochemistry, Utah State University Logan, Utah 84322-  
0300, United States

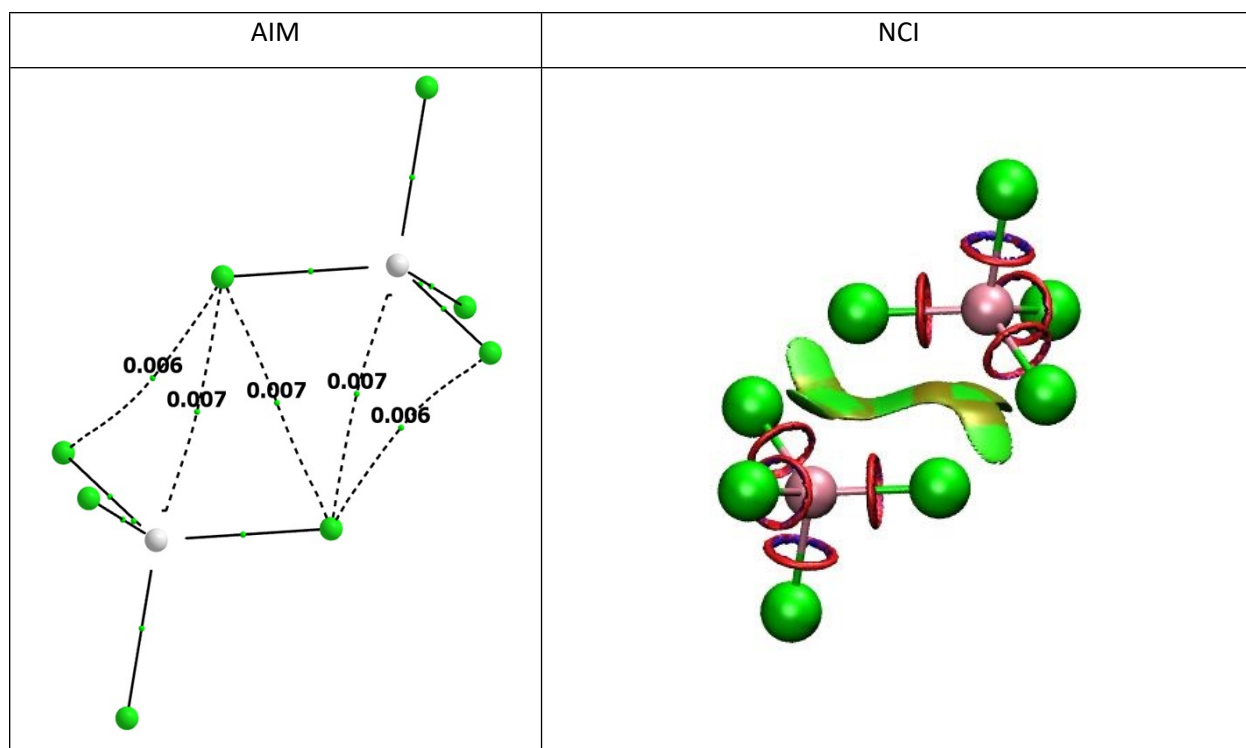

Fig S1. AIM and NCI analyses of the TlCl<sub>4</sub><sup>-</sup> dimer, with geometry extracted from the X-ray structure.

|        |          |
|--------|----------|
| FODRUL | <p>7</p> |
| GARBAD |          |
| HULBUL |          |
| NETNEF |          |

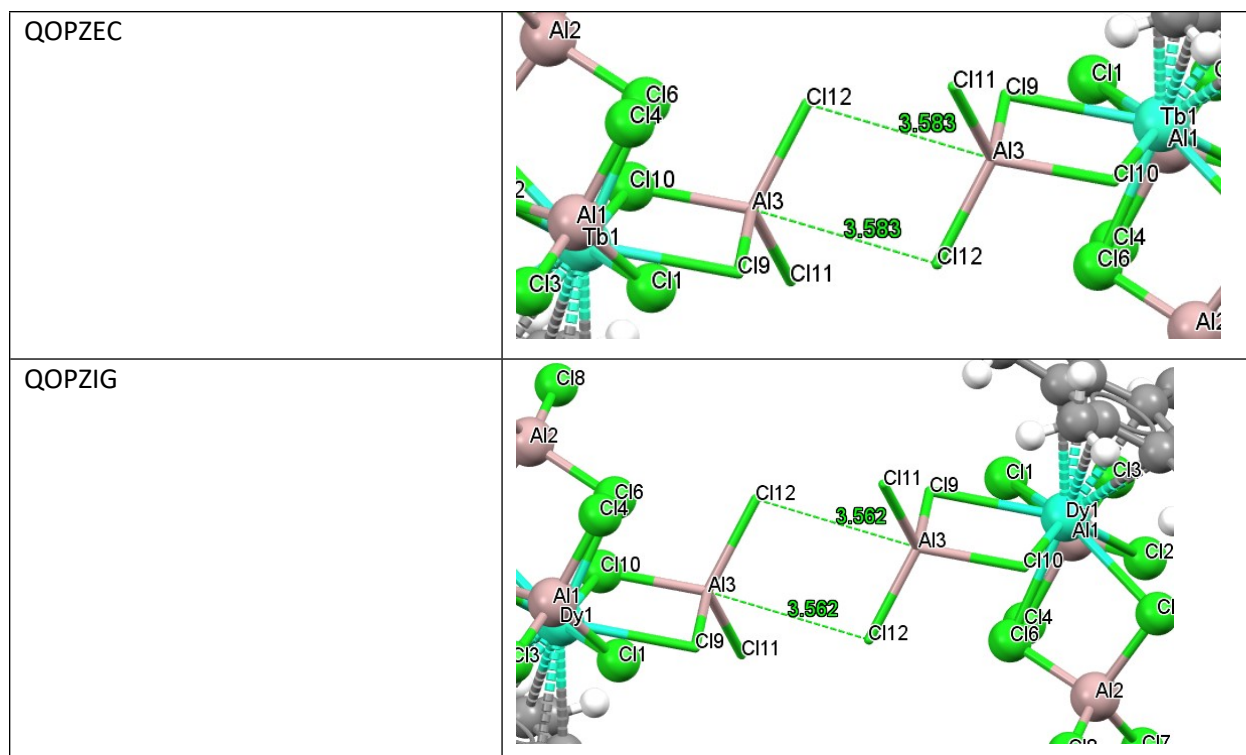

Fig. S2 Examples of the structures with similar organization as that discussed in current work. Interanionic interactions are indicated by green dashed lines. Distances given in Å.

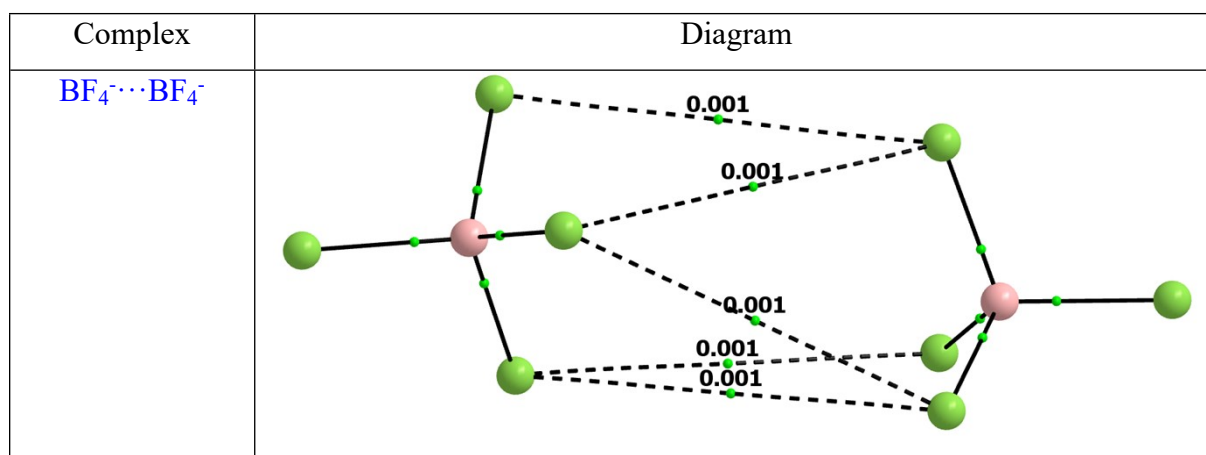

$\text{AlF}_4^- \cdots \text{AlF}_4^-$

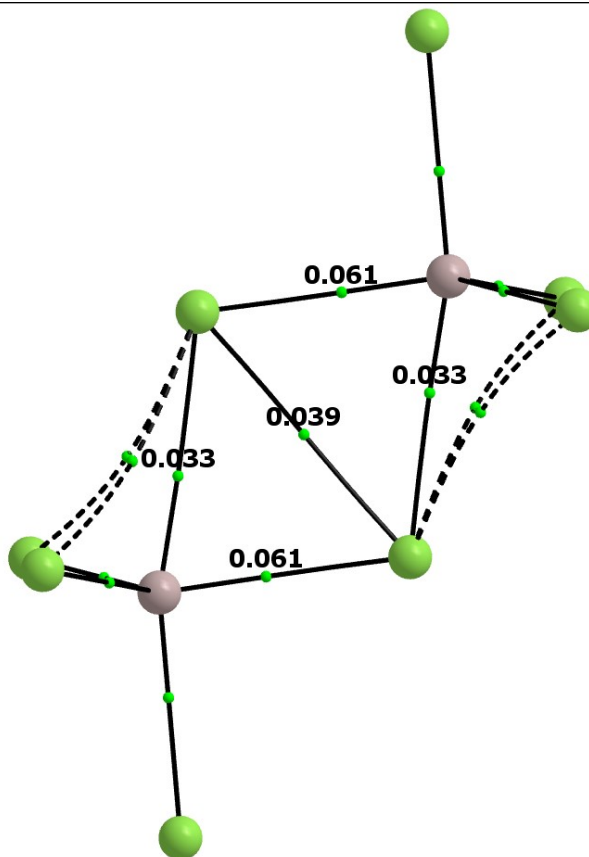

$\text{GaF}_4^- \cdots \text{GaF}_4^-$

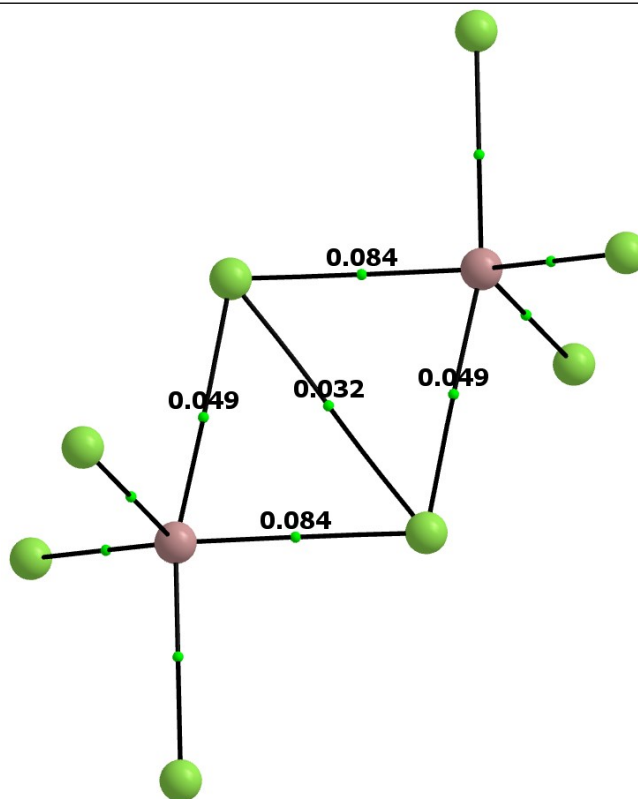

$\text{InF}_4^- \cdots \text{InF}_4^-$

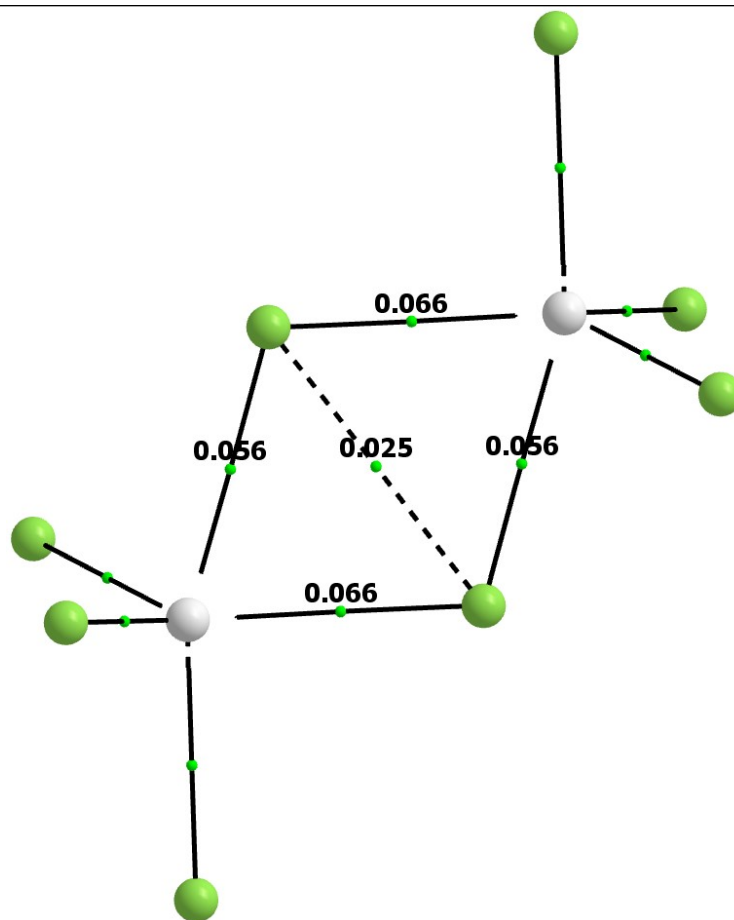

$\text{TlF}_4^- \cdots \text{TlF}_4^-$

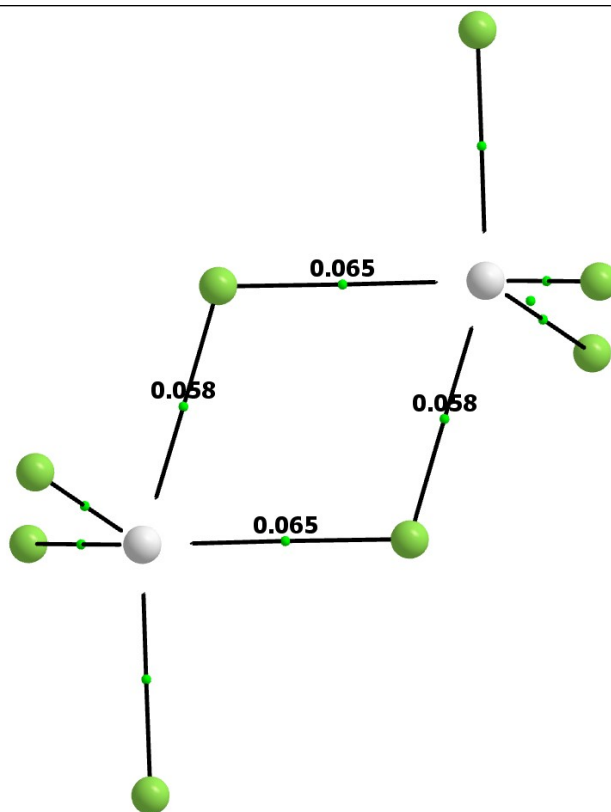

$\text{BCl}_4^- \cdots \text{BCl}_4^-$

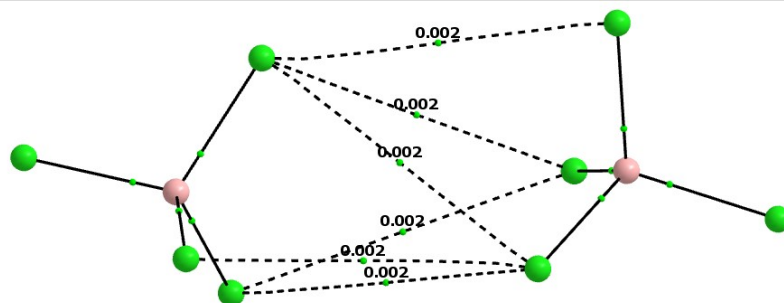

$\text{AlCl}_4^- \cdots \text{AlCl}_4^-$

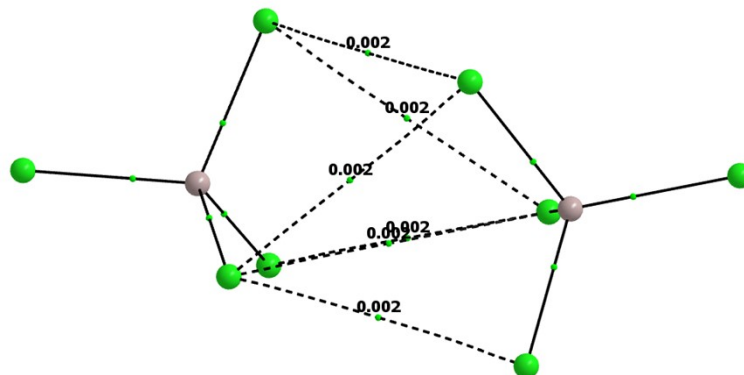

$\text{GaCl}_4^- \cdots \text{GaCl}_4^-$

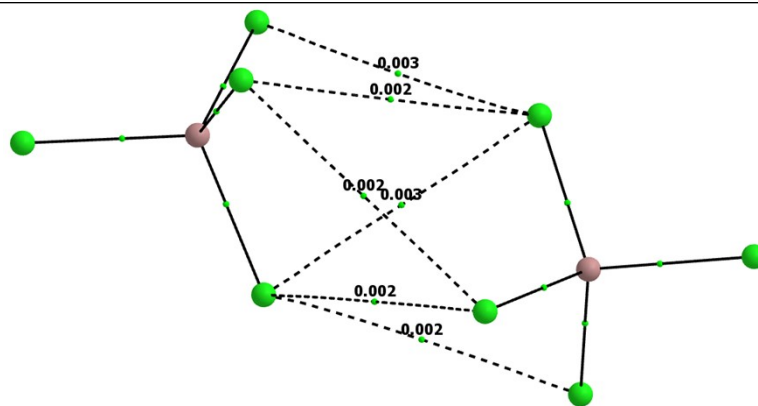

$\text{InCl}_4^- \cdots \text{InCl}_4^-$

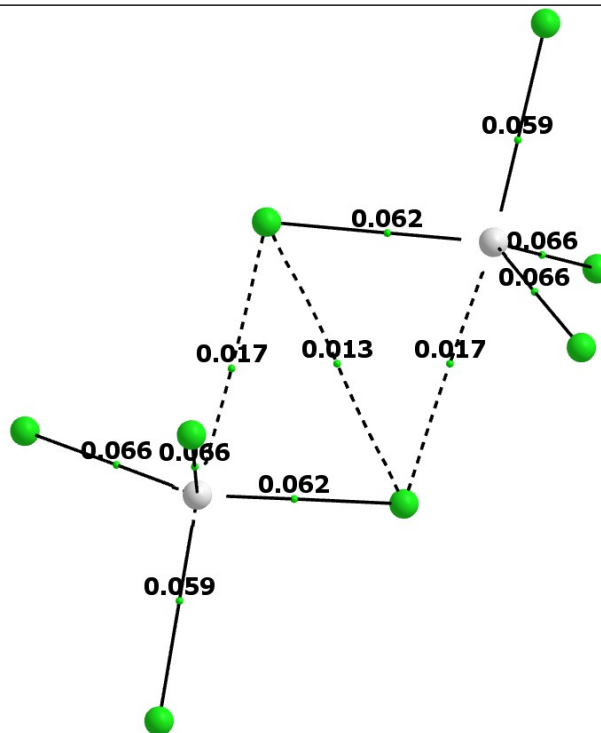

$\text{TlCl}_4^- \cdots \text{TlCl}_4^-$

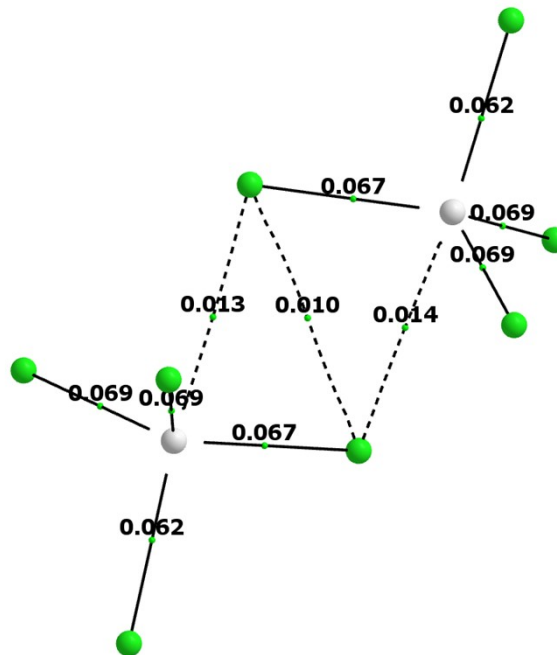

$\text{BBr}_4^- \cdots \text{BBr}_4^-$

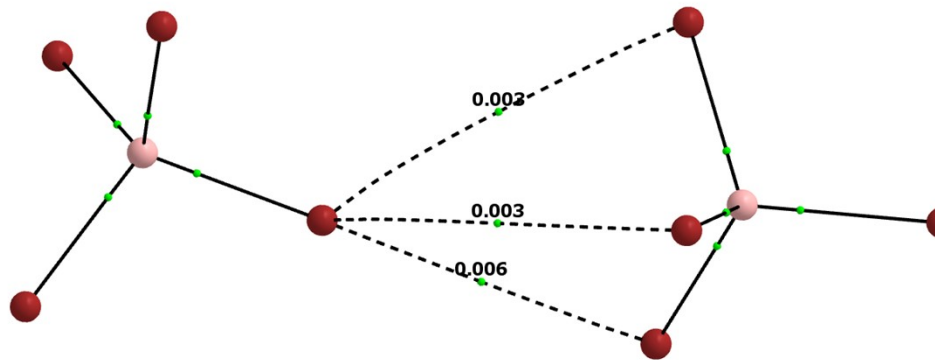

$\text{AlBr}_4^- \cdots \text{AlBr}_4^-$

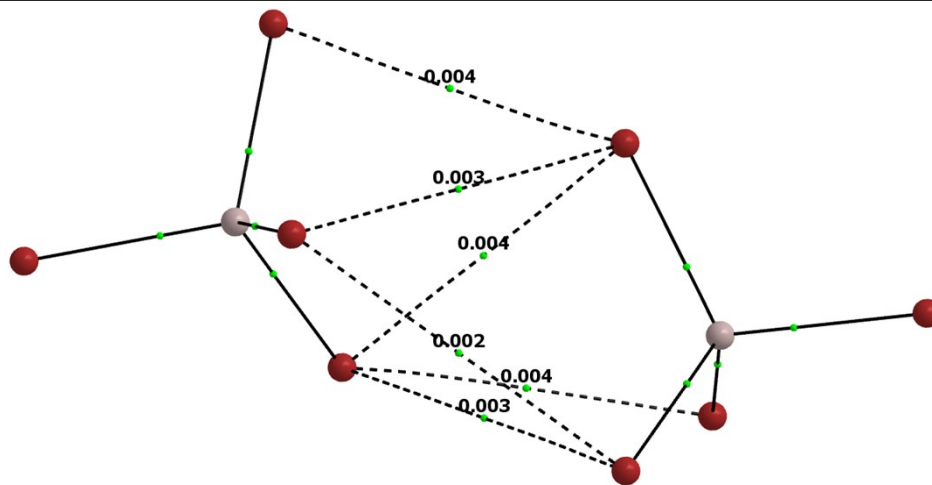



$\text{GaBr}_4^- \cdots \text{GaBr}_4^-$

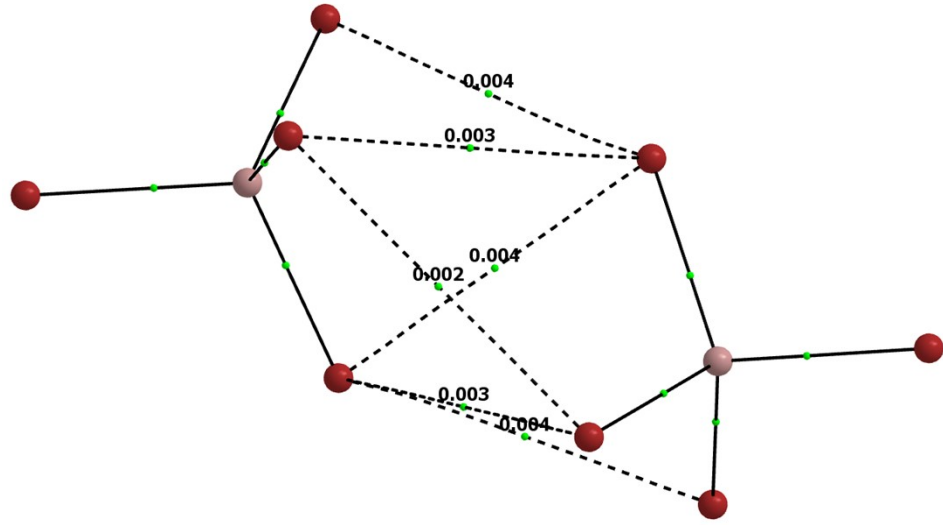

$\text{InBr}_4^- \cdots \text{InBr}_4^-$

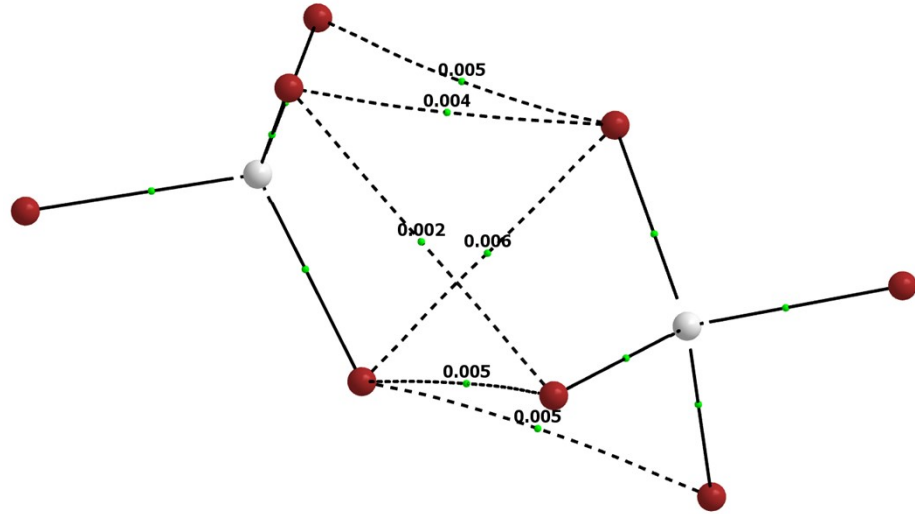

$\text{TlBr}_4^- \cdots \text{TlBr}_4^-$

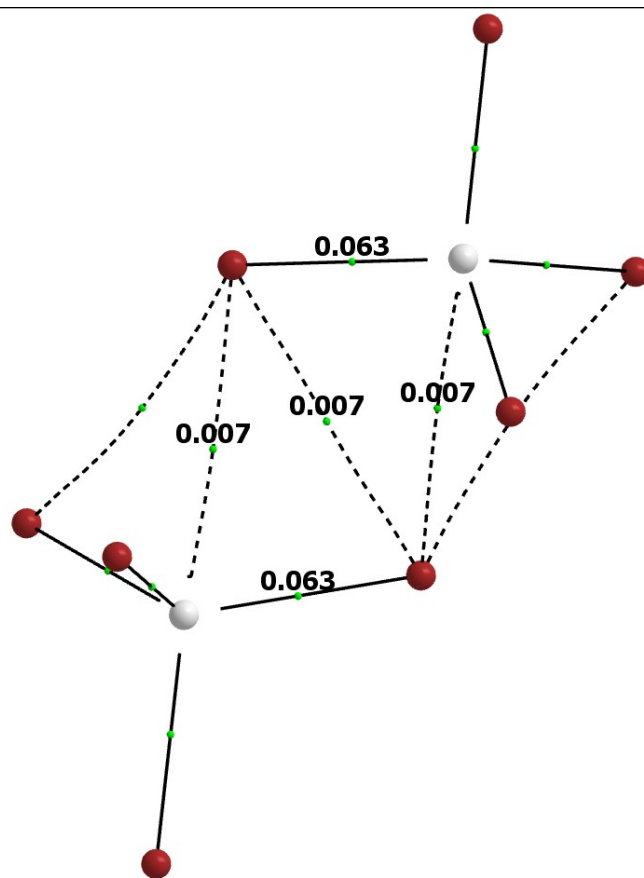

Fig. S3. AIM diagrams of investigated homodimers.
